# Supplementary material for: Development of a Laser-Photofragmentation Laser-Induced Fluorescence instrument for the detection of nitrous acid and hydroxyl radicals in the atmosphere
Source: Copernicus journal article supplement (doi:10.5194/amt-2021-102), 2021-04-23
Supplement: Supplementary file 1 [file amt-2021-102-supplement.pdf]

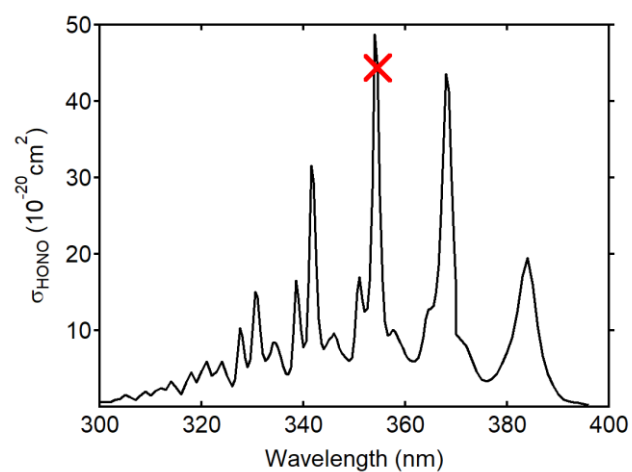

**Figure S1:** Absorption cross section of HONO with the 355-nm emission from the third harmonic of the Nd:YLF laser highlighted.

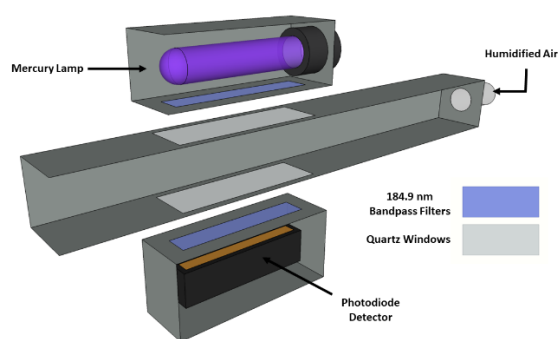

**Figure S2:** Diagram of the water vapor photolysis calibration source.

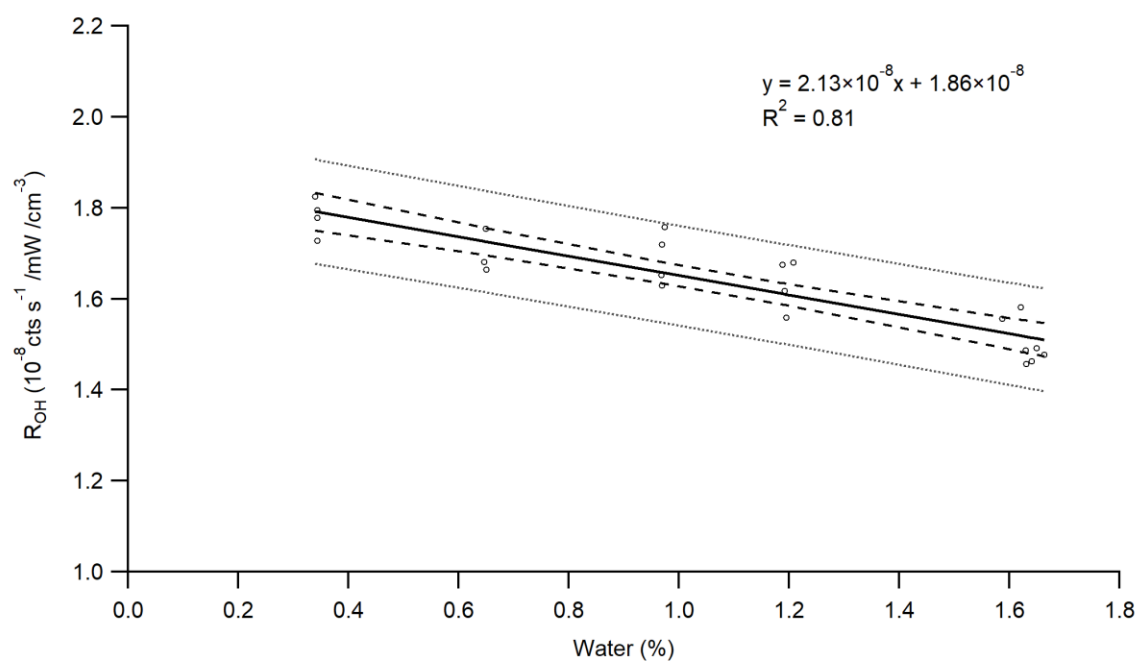

**Figure S3:** Plot of instrumental sensitivity to OH ( $R_{OH}$ ) dependence on water vapor. The dashed lines represent a 95% linear fit confidence interval and the dotted lines represent a 95% prediction interval.

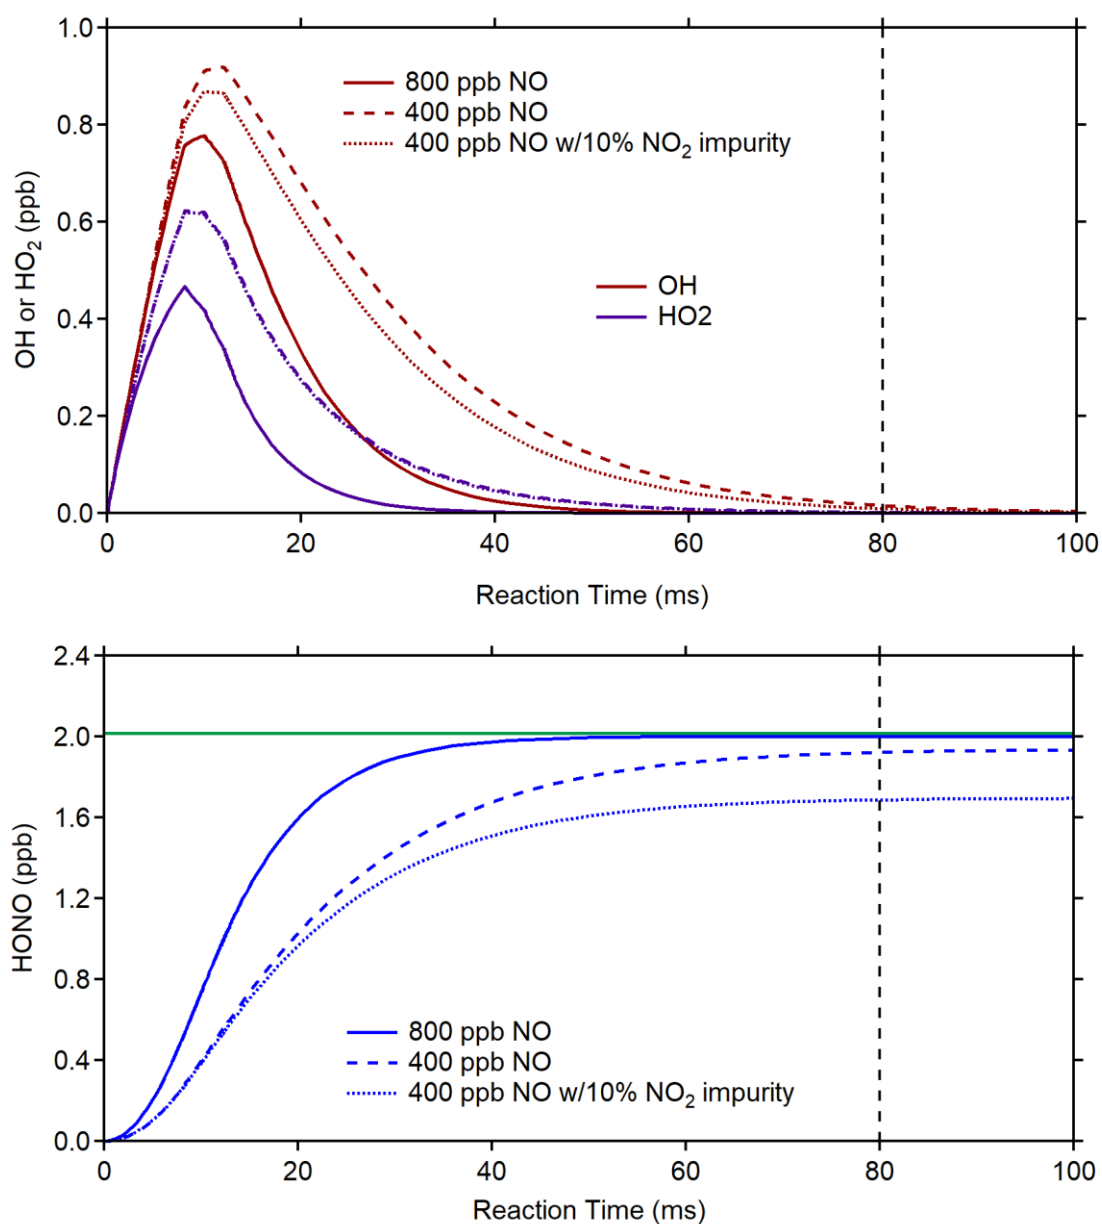

**Figure S4:** Photolysis efficiency (PE) calibration modeling. The black dashed line represents the approximate reaction time between the onset of radical production from 184.9-nm photolysis of water and the exit of the calibration source, at a flow rate of 10 SLPM, and the green line represents the total radicals produced in the photolysis region in the absence of NO.
